# Supplementary material for: Interactions of piRNAs with the mRNA of Candidate Genes in Esophageal Squamous Cell Carcinoma
Source: MDPI journal article supplement (doi:10.3390/cimb45070387), 2023-07-23
Supplement: s1 [file s1]

**Table S1.** List of candidate genes for ESCC.

| Gene            | PubMed   | Gene          | PubMed   | Gene            | PubMed   |
|-----------------|----------|---------------|----------|-----------------|----------|
| <i>ABCG2</i>    | 22236447 | <i>EMP1</i>   | 22888304 | <i>MMP13</i>    | 32035950 |
| <i>ADAMTS12</i> | 31236983 | <i>ERCC1</i>  | 32611208 | <i>MMP2</i>     | 32436041 |
| <i>ADAMTS2</i>  | 29358879 | <i>FSCN1</i>  | 35401239 | <i>MMP3</i>     | 30969151 |
| <i>ADH1A</i>    | 29248712 | <i>GCOM1</i>  | 25823933 | <i>MMP7</i>     | 21455340 |
| <i>ADH1B</i>    | 27038040 | <i>HLA-G</i>  | 29067119 | <i>MMP9</i>     | 33572115 |
| <i>ALDH2</i>    | 35788888 | <i>HOXA10</i> | 31950785 | <i>MTHFR</i>    | 28046029 |
| <i>AURKA</i>    | 32572158 | <i>HPGD</i>   | 35317779 | <i>NAT2</i>     | 25886288 |
| <i>BMI1</i>     | 32239639 | <i>IBSP</i>   | 31709184 | <i>PDGFRA</i>   | 29358879 |
| <i>BMP7</i>     | 23504348 | <i>IGFBP3</i> | 35782901 | <i>PLAU</i>     | 33574243 |
| <i>C2orf40</i>  | 27698864 | <i>ITGA3</i>  | 35782901 | <i>POSTN</i>    | 32613365 |
| <i>CCNA2</i>    | 34737951 | <i>ITGB4</i>  | 30479571 | <i>PPP1R3C</i>  | 29844815 |
| <i>CCND1</i>    | 34611831 | <i>LAMA3</i>  | 29358879 | <i>SASH1</i>    | 30443973 |
| <i>CCNE1</i>    | 28800315 | <i>LAMB3</i>  | 36415640 | <i>SH3BGRL2</i> | 25823933 |
| <i>COL10A1</i>  | 35117161 | <i>LAMC2</i>  | 29511340 | <i>SIX1</i>     | 28260921 |
| <i>COL11A1</i>  | 34790783 | <i>MEIS1</i>  | 32819319 | <i>SIX4</i>     | 33481352 |
| <i>COL1A1</i>   | 35117161 | <i>MFAP2</i>  | 29358879 | <i>SOX2</i>     | 31991109 |
| <i>COL27A1</i>  | 29358879 | <i>MGLL</i>   | 25823933 | <i>SPP1</i>     | 36467891 |
| <i>COL7A1</i>   | 18331784 | <i>MLF1</i>   | 29358879 | <i>SULT1A1</i>  | 12455060 |
| <i>CYP1A1</i>   | 26455829 | <i>MMP1</i>   | 27130665 | <i>SULT1A1</i>  | 12455060 |
| <i>EGR1</i>     | 29047233 | <i>MMP10</i>  | 22121946 | <i>TCF3</i>     | 29358879 |
| <i>ELN</i>      | 25823933 | <i>MMP11</i>  | 29358879 | <i>TP53</i>     | 34611831 |
| <i>EMP1</i>     | 22888304 | <i>MMP12</i>  | 35265129 |                 |          |

Note. Nine candidate piRNA target genes for esophageal squamous cell carcinoma are highlighted in yellow.
