# Supplementary material for: Interactions of piRNAs with the mRNA of Candidate Genes in Esophageal Squamous Cell Carcinoma
Source: MDPI journal article supplement (doi:10.3390/cimb45070387), 2023-07-23
Supplement: s1 [file s1]

**Table S11.** piRNAs that bind to the mRNA of *AURKA*, *ERCC1*, *SASH1* and *SIX4* genes.

| piRNA                                           | <i>AURKA</i> | <i>ERCC1</i> | <i>SASH1</i> | <i>SIX4</i> |
|-------------------------------------------------|--------------|--------------|--------------|-------------|
| piR-74077                                       | +            | +            | +            | +           |
| piR-108578                                      | +            | +            | +            | +           |
| piR-88365                                       | +            | +            | -            | +           |
| piR-115026                                      | +            | -            | -            | +           |
| piR-120925                                      | +            | -            | +            | +           |
| piR-216660                                      | +            | +            | +            | -           |
| piR-81461                                       | +            | -            | +            | -           |
| piR-110734                                      | +            | +            | +            | +           |
| piR-206181                                      | +            | +            | +            | -           |
| piR-224694                                      | +            | +            | +            | -           |
| piR-49581                                       | +            | +            | +            | -           |
| piR-120170                                      | +            | +            | +            | +           |
| piR-128529                                      | +            | +            | +            | -           |
| piR-145556                                      | +            | -            | +            | +           |
| piR-69165                                       | +            | +            | -            | +           |
| piR-123162                                      | +            | +            | -            | +           |
| piR-321692                                      | +            | -            | -            | +           |
| piR-112665                                      | +            | -            | +            | +           |
| piR-270870                                      | +            | +            | -            | +           |
| piR-302301                                      | +            | -            | -            | +           |
| piR-274756                                      | +            | -            | -            | +           |
| piR-288286                                      | +            | +            | +            | +           |
| piR-113908                                      | +            | +            | -            | +           |
| piR-258342                                      | +            | +            | -            | -           |
| piR-226914                                      | +            | +            | -            | -           |
| piR-230823                                      | +            | +            | -            | -           |
| piR-287550                                      | +            | +            | -            | -           |
| piR-230473                                      | +            | +            | +            | -           |
| piR-199338                                      | +            | -            | +            | -           |
| piR-57622                                       | +            | +            | +            | -           |
| piR-99677                                       | +            | +            | +            | +           |
| piR-257600                                      | +            | +            | +            | -           |
| piR-272067                                      | +            | +            | +            | -           |
| piR-445186                                      | +            | +            | +            | -           |
| piR-454666                                      | +            | +            | +            | -           |
| piR-219325                                      | +            | +            | +            | +           |
| piR-249982                                      | +            | +            | +            | +           |
| piR-282903                                      | +            | +            | +            | +           |
| piR-341211                                      | +            | -            | +            | +           |
| piR-38326                                       | +            | +            | +            | +           |
| piR-197774                                      | +            | -            | +            | +           |
| piR-320670                                      | +            | +            | -            | +           |
| piR-363930                                      | +            | -            | +            | -           |
| piR-424861                                      | +            | +            | +            | +           |
| piR-479539                                      | +            | -            | -            | +           |
| piR-196512                                      | +            | -            | +            | +           |
| piR-347859                                      | +            | -            | +            | +           |
| piR-98281                                       | +            | -            | -            | +           |
| piR-121234                                      | +            | +            | +            | -           |
| piR-325698                                      | +            | +            | +            | +           |
| piR-200086                                      | +            | +            | -            | +           |
| piR-67883                                       | +            | +            | +            | +           |
| piR-306330                                      | +            | +            | -            | +           |
| piR-200135                                      | +            | +            | +            | +           |
| piR-344301                                      | +            | -            | -            | +           |
| piR-267379                                      | +            | +            | +            | +           |
| Note. “+” indicates the presence of a piRNA BSs |              |              |              |             |
